# Supplementary material for: Recent advances in small-molecule fluorescent probes for studying ferroptosis
Source: Royal Society of Chemistry journal article supplement (doi:10.1039/d1cs01167g), 2022-01-01
Supplement: d1cs01167g1.pdf [file d1cs01167g1.pdf]

## Probe 1 ref. 84

### RE: Ask for permissions ☆ 𠄎

发件人: PNAS Permissions <PNASPermissions@nas.edu>

时间: 2022年3月31日(星期四) 晚上10:36

收件人: zhuhl <zhuhl@nju.edu.cn>

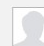

翻译全文 | 𠄎 𠄎 𠄎

Dear Dr. Zhu,

Thank you for your message. Authors do not need to obtain permission for the following uses of material they have published in PNAS under our standard license:

- to use their original figures or tables in their future works;
- to make copies of their papers for their own personal use, including classroom use, or for the personal use of colleagues, provided those copies are not for sale and are not distributed in a systematic way;
- to include their articles as part of their dissertations; or
- to use all or part of their articles in printed compilations of their own works.

Please include a full citation for the original PNAS article when reusing the material. Because this material published after 2008, a copyright note is not required.

You may also refer to <https://www.pnas.org/authors/fees-and-licenses> for more information. Feel free to contact us with any additional questions you might have.

Best regards,  
Greg McCoy for  
Diane Sullenberger  
PNAS Executive Editor

## Probe 7 ref. 100

### Ferroptosis Accompanied by $\cdot\text{OH}$ Generation and Cytoplasmic Viscosity Increase Revealed via Dual-Functional Fluorescence Probe

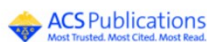

Author: Hongyu Li, Wen Shi, Xiaohua Li, et al

Publication: Journal of the American Chemical Society

Publisher: American Chemical Society

Date: Nov 1, 2019

Copyright © 2019, American Chemical Society

#### PERMISSION/LICENSE IS GRANTED FOR YOUR ORDER AT NO CHARGE

This type of permission/license, instead of the standard Terms and Conditions, is sent to you because no fee is being charged for your order. Please note the following:

- Permission is granted for your request in both print and electronic formats, and translations.
- If figures and/or tables were requested, they may be adapted or used in part.
- Please print this page for your records and send a copy of it to your publisher/graduate school.
- Appropriate credit for the requested material should be given as follows: "Reprinted (adapted) with permission from {COMPLETE REFERENCE CITATION}. Copyright {YEAR} American Chemical Society." Insert appropriate information in place of the capitalized words.
- One-time permission is granted only for the use specified in your RightsLink request. No additional uses are granted (such as derivative works or other editions). For any uses, please submit a new request.

If credit is given to another source for the material you requested from RightsLink, permission must be obtained from that source.

BACK

CLOSE WINDOW

## Probe 8 ref. 112

|                                                                                                 |                                                                                        |                                                               |                                        |
|-------------------------------------------------------------------------------------------------|----------------------------------------------------------------------------------------|---------------------------------------------------------------|----------------------------------------|
| 2. Talanta     |                                                                                        | 0.00 USD                                                      |                                        |
| Article: Monitoring hydrogen polysulfide during ferroptosis with a two-photon fluorescent probe |                                                                                        | Publisher Terms and Conditions                                |                                        |
| ISSN                                                                                            | 0039-9140                                                                              | Publisher                                                     | ELSEVIER BV                            |
| Type of Use                                                                                     | Republish in a journal/magazine                                                        | Portion                                                       | Image/photo/illustration               |
| <a href="#">Hide Details</a>                                                                    |                                                                                        |                                                               |                                        |
| LICENSED CONTENT                                                                                |                                                                                        |                                                               |                                        |
| Publication Title                                                                               | Talanta                                                                                | Rightsholder                                                  | Elsevier Science & Technology Journals |
| Article Title                                                                                   | Monitoring hydrogen polysulfide during ferroptosis with a two-photon fluorescent probe | Publication Type                                              | Journal                                |
| Date                                                                                            | 01/01/1958                                                                             | Start Page                                                    | 122467                                 |
| Language                                                                                        | English                                                                                | Volume                                                        | 232                                    |
| Country                                                                                         | Netherlands                                                                            |                                                               |                                        |
| REQUEST DETAILS                                                                                 |                                                                                        |                                                               |                                        |
| Portion Type                                                                                    | Image/photo/illustration                                                               | Distribution                                                  | Worldwide                              |
| Number of images / photos / illustrations                                                       | 1                                                                                      | Translation                                                   | Original language of publication       |
| Format (select all that apply)                                                                  | Print, Electronic                                                                      | Copies for the disabled?                                      | Yes                                    |
| Who will republish the content?                                                                 | Author of requested content                                                            | Minor editing privileges?                                     | No                                     |
| Duration of Use                                                                                 | Life of current edition                                                                | Incidental promotional use?                                   | No                                     |
| Lifetime Unit Quantity                                                                          | Up to 999                                                                              | Currency                                                      | USD                                    |
| Rights Requested                                                                                | Main product                                                                           |                                                               |                                        |
| NEW WORK DETAILS                                                                                |                                                                                        |                                                               |                                        |
| Title                                                                                           | Recent advances in small-molecule fluorescent probes for studying ferroptosis          | Publisher imprint                                             | N/A                                    |
| Author                                                                                          | Yalin Qi                                                                               | Expected publication date                                     | 2022-08-01                             |
| Publication                                                                                     | Chemical Society Reviews                                                               | Expected size (number of pages)                               | 65                                     |
| Publisher                                                                                       | Royal Society of Chemistry                                                             | Standard identifier                                           | N/A                                    |
| ADDITIONAL DETAILS                                                                              |                                                                                        |                                                               |                                        |
| Order reference number                                                                          | N/A                                                                                    | The requesting person / organization to appear on the license | Hailiang Zhu                           |
| REUSE CONTENT DETAILS                                                                           |                                                                                        |                                                               |                                        |

## Probe 9 ref. 116

### Near-infrared fluorescent probe for hydrogen sulfide: high-fidelity ferroptosis evaluation *in vivo* during stroke

T. Liang, T. Qiang, L. Ren, F. Cheng, B. Wang, M. Li, W. Hu and T. D. James, *Chem. Sci.*, 2022, **13**, 2992  
**DOI:** 10.1039/D1SC05930K

This article is licensed under a [Creative Commons Attribution 3.0 Unported Licence](#). You can use material from this article in other publications without requesting further permissions from the RSC, provided that the correct acknowledgement is given.

Read more about [how to correctly acknowledge RSC content](#).

## Probes 10 and 11 ref. 124

Your confirmation email will contain your order number for future reference.

|                |               |                                   |
|----------------|---------------|-----------------------------------|
| License Number | 5346180462507 | <a href="#">Printable Details</a> |
| License date   | Jul 11, 2022  |                                   |

|                             |                                                                                               |
|-----------------------------|-----------------------------------------------------------------------------------------------|
| <b>License Content</b>      |                                                                                               |
| License Content Publisher   | Elsevier                                                                                      |
| License Content Publication | Analytica Chimica Acta                                                                        |
| License Content Title       | In vivo tracking cystine/glutamate antiporter-mediated cystine/cystine pool under ferroptosis |
| License Content Author      | Zhen Li, Yan Li, Kuehkh Yang, Zhiyuan Gong, Hailiang Zhou, Yong Qian                          |
| License Content Date        | Aug 15, 2020                                                                                  |
| License Content Volume      | 1125                                                                                          |
| License Content Issue       | n/a                                                                                           |
| License Content Pages       | 10                                                                                            |

|                                              |                                |
|----------------------------------------------|--------------------------------|
| <b>Order Details</b>                         |                                |
| Type of Use                                  | reuse in a journal/magazine    |
| Requester type                               | academic/educational institute |
| Person                                       | figures/tables/illustrations   |
| Number of figures/tables/illustrations       | 1                              |
| Format                                       | both print and electronic      |
| Are you the author of this Elsevier article? | Yes                            |
| Will you be translating?                     | No                             |

|                           |                                                                               |
|---------------------------|-------------------------------------------------------------------------------|
| <b>About Your Work</b>    |                                                                               |
| Title of new article      | Recent advances in small-molecule fluorescent probes for studying ferroptosis |
| Lead author               | Yalin Qi                                                                      |
| Title of targeted journal | Chemical Society Reviews                                                      |
| Publisher                 | Royal Society of Chemistry                                                    |
| Expected publication date | Sep 2022                                                                      |

|                        |        |
|------------------------|--------|
| <b>Additional Data</b> |        |
| Order reference number | 124    |
| Portions               | Fig. 8 |

|                           |                                                                                  |
|---------------------------|----------------------------------------------------------------------------------|
| <b>Requester Location</b> |                                                                                  |
| Requester Location        | Yalin Qi<br>Nanjing University<br><br>Nanjing, Jiangsu Province<br>China<br>Asia |

|                    |               |
|--------------------|---------------|
| <b>Tax Details</b> |               |
| Publisher Tax ID   | GB-4944272-12 |

|              |          |
|--------------|----------|
| <b>Price</b> |          |
| Total        | 0.00 USD |

Total: 0.00 USD

[CLOSE WINDOW](#) [ORDER MORE](#)

## Probes 12 ref. 125

**CCC | RightsLink®** ? Help ▾ Live Chat

**Quantitative real-time imaging of glutathione**

**Author:** Xiqian Jiang et al  
**Publication:** Nature Communications  
**Publisher:** Springer Nature  
**Date:** Jul 13, 2017

*Copyright © 2017, The Author(s)*

**Creative Commons**

This is an open access article distributed under the terms of the [Creative Commons CC BY](#) license, which permits unrestricted use, distribution, and reproduction in any medium, provided the original work is properly cited.

You are not required to obtain permission to reuse this article.  
 To request permission for a type of use not listed, please contact [Springer Nature](#)

## Probe 13 ref. 126

### Unique assembly of carbonylpyridinium and chromene reveals mitochondrial thiol starvation under ferroptosis and novel ferroptosis inducer

K. Ma, H. Yang, T. Shen, Y. Yue, L. Zhao, X. Liu, F. Huo and C. Yin, *Chem. Sci.*, 2022, **13**, 3706 DOI: 10.1039/D2SC00328G

This article is licensed under a [Creative Commons Attribution-NonCommercial 3.0 Unported Licence](#). You can use material from this article in other publications, without requesting further permission from the RSC, provided that the correct acknowledgement is given and it is not used for commercial purposes.

To request permission to reproduce material from this article in a commercial publication, please go to the [Copyright Clearance Center request page](#).

If you are an author contributing to an RSC publication, you do not need to request permission provided correct acknowledgement is given.

If you are the author of this article, you do not need to request permission to reproduce figures and diagrams provided correct acknowledgement is given. If you want to reproduce the whole article in a third-party commercial publication (excluding your thesis/dissertation for which permission is not required) please go to the [Copyright Clearance Center request page](#).

## Probe 14 ref. 132

**Request permission**  

姓名: [zhu@nju.edu.cn](mailto:zhu@nju.edu.cn)  
时间: 2022年4月10日(星期一) 16:11:24  
收件人: zhu@nju.edu.cn

Hello Dr. Zhu,  
Your permission requested is granted and there is no fee for this reuse.  
In your planned reuse, you must cite the ACS article as the source, add this direct link: <https://pubs.acs.org/doi/10.1021/acs.6b08016> and include a notice to readers that further permission related to the material excerpted should be directed to the ACS.  
Please do not hesitate to contact me if you need any further assistance.

Drew Jenkins  
ACS Publications Support  
Customer Services & Information  
Website: <https://acs.service-now.com/acs>  
Email: [csupport@pubs.acs.org](mailto:csupport@pubs.acs.org)  
Phone: 800-227-5919 | 202-872-CHELP 4357

**Case Info:**  
**Case Number:** CSCS1066576  
**Created On:** 04-30-2022 03:38:20 AM EDT  
**Short Description:** Request permission  
**Description:** Dear Editors,  
Inbop, I am writing this email to ask you to give me the permissions to reuse the Figure 4 of the published article "An Endoperoxide Reactivity-Based FRET Probe for Ratiometric Fluorescence Imaging of Labile Iron Pools in Living Cells (J. Am. Chem. Soc., 2016, 138, 14338–14346)", The picture will be reused in our review "Recent advances in small-molecule fluorescent probes for studying ferroptosis", which will be submitted to Chemical Society Reviews. Thank you for your help.  
Sincerely yours,  
Prof. H.-L. Zhu  
State Key Laboratory of Pharmaceutical Biotechnology  
Nanjing University  
Nanjing 210023, P. R. China  
E-mail: [zhu@nju.edu.cn](mailto:zhu@nju.edu.cn)  
Sincerely,  
Drew Jenkins  
ACS Chemistry for Life  
American Chemical Society  
Ref:MSG0479407\_s1fplQmgpyjwzhphuh

## Probe 19 ref. 135

Your confirmation email will contain your order number for future reference.

|                |               |                                   |
|----------------|---------------|-----------------------------------|
| License Number | 5346180323432 | <a href="#">Printable Details</a> |
| License date   | Jul 11, 2022  |                                   |

---

|                              |                                                                                                                               |  |
|------------------------------|-------------------------------------------------------------------------------------------------------------------------------|--|
| <b>Licensed Content</b>      |                                                                                                                               |  |
| Licensed Content Publisher   | Elsevier                                                                                                                      |  |
| Licensed Content Publication | Cell Chemical Biology                                                                                                         |  |
| Licensed Content Title       | 3D two-photon brain imaging reveals dihydroartemisinin exerts antiepileptic effects by modulating iron homeostasis            |  |
| Licensed Content Author      | Chenwei Shao, Yali Liu, Zhongqiang Chen, Yajuan Qin, Juesao Wang, Xueting Wang, Chao Yan, Hai-Liang Zhu, Jing Zhao, Yong Qian |  |
| Licensed Content Date        | Jan 20, 2022                                                                                                                  |  |
| Licensed Content Volume      | 29                                                                                                                            |  |
| Licensed Content Issue       | 1                                                                                                                             |  |
| Licensed Content Pages       | 26                                                                                                                            |  |

---

|                           |                                                                               |  |
|---------------------------|-------------------------------------------------------------------------------|--|
| <b>About Your Work</b>    |                                                                               |  |
| Title of new article      | Recent advances in small molecule fluorescent probes for studying ferroptosis |  |
| Lead author               | Yalin Qi                                                                      |  |
| Title of targeted journal | Chemical Society Reviews                                                      |  |
| Publisher                 | Royal Society of Chemistry                                                    |  |
| Expected publication date | Sep 2022                                                                      |  |

---

|                           |                                            |  |
|---------------------------|--------------------------------------------|--|
| <b>Requestor Location</b> |                                            |  |
| Requestor Location        | Yalin Qi<br>Nanjing University             |  |
|                           | Nanjing, Jiangsu Province<br>China<br>Asia |  |

---

|              |          |  |
|--------------|----------|--|
| <b>Price</b> |          |  |
| Total        | 0.00 USD |  |

---

Total: 0.00 USD

## Probe 21 ref. 139

 [Home](#) [Help](#) [Live Chat](#) [Yalin Qi](#)

---

**Reversible FRET Fluorescent Probe for Ratiometric Tracking of Endogenous Fe3 in Ferroptosis**  
Author: Jing Gao, Yueqin He, Yuncong Chen, et al  
Publication: Inorganic Chemistry  
Publisher: American Chemical Society  
Date: Aug 1, 2020  
Copyright © 2020, American Chemical Society

---

**PERMISSION/LICENSE IS GRANTED FOR YOUR ORDER AT NO CHARGE**

This type of permission/license, instead of the standard Terms and Conditions, is sent to you because no fee is being charged for your order. Please note the following:

- Permission is granted for your request in both print and electronic formats, and translations.
- If figures and/or tables were requested, they may be adapted or used in part.
- Please print this page for your records and send a copy of it to your publisher/graduate school.
- Appropriate credit for the requested material should be given as follows: "Reprinted (adapted) with permission from (COMPLETE REFERENCE CITATION). Copyright (YEAR) American Chemical Society." Insert appropriate information in place of the capitalized words.
- One-time permission is granted only for the use specified in your RightsLink request. No additional uses are granted (such as derivative works or other editions). For any uses, please submit a new request.

If credit is given to another source for the material you requested from RightsLink, permission must be obtained from that source.

[BACK](#)

[CLOSE WINDOW](#)

## Probe 22 ref. 148

 **Imaging of Mitophagy Enabled by an Acidity-Reporting Probe Anchored on the Mitochondrial Inner Membrane**  
Author: Shixiong Wen, Xiao Hu, Yilong Shi, et al  
Publication: Analytical Chemistry  
Publisher: American Chemical Society  
Date: Dec 1, 2021  
Copyright © 2021, American Chemical Society

---

**PERMISSION/LICENSE IS GRANTED FOR YOUR ORDER AT NO CHARGE**

This type of permission/license, instead of the standard Terms and Conditions, is sent to you because no fee is being charged for your order. Please note the following:

- Permission is granted for your request in both print and electronic formats, and translations.
- If figures and/or tables were requested, they may be adapted or used in part.
- Please print this page for your records and send a copy of it to your publisher/graduate school.
- Appropriate credit for the requested material should be given as follows: "Reprinted (adapted) with permission from (COMPLETE REFERENCE CITATION). Copyright (YEAR) American Chemical Society." Insert appropriate information in place of the capitalized words.
- One-time permission is granted only for the use specified in your RightsLink request. No additional uses are granted (such as derivative works or other editions). For any uses, please submit a new request.

If credit is given to another source for the material you requested from RightsLink, permission must be obtained from that source.

[BACK](#)

[CLOSE WINDOW](#)

## Probe 23 ref. 150

**Revealing the Viscosity Changes in Lipid Droplets during Ferroptosis by the Real-Time and In Situ Near-Infrared Imaging**

Author: Baoli Dong, Wenhui Song, Yaru Lu, et al  
 Publication: ACS Sensors  
 Publisher: American Chemical Society  
 Date: Jan 1, 2021  
 Copyright © 2021, American Chemical Society

**PERMISSION/LICENSE IS GRANTED FOR YOUR ORDER AT NO CHARGE**

This type of permission/license, instead of the standard Terms and Conditions, is sent to you because no fee is being charged for your order. Please note the following:

- Permission is granted for your request in both print and electronic formats, and translations.
- If figures and/or tables were requested, they may be adapted or used in part.
- Please print this page for your records and send a copy of it to your publisher/graduate school.
- Appropriate credit for the requested material should be given as follows: "Reprinted (adapted) with permission from (COMPLETE REFERENCE CITATION). Copyright (YEAR) American Chemical Society." Insert appropriate information in place of the capitalized words.
- One-time permission is granted only for the use specified in your RightsLink request. No additional uses are granted (such as derivative works or other editions). For any uses, please submit a new request.

If credit is given to another source for the material you requested from RightsLink, permission must be obtained from that source.

[BACK](#) [CLOSE WINDOW](#)

## Probes 24-27 ref. 151

**A Near-Infrared Probe for Specific Imaging of Lipid Droplets in Living Cells**

Author: Xue Wu, Xiaoxiu Wang, Ying Li, et al  
 Publication: Analytical Chemistry  
 Publisher: American Chemical Society  
 Date: Mar 1, 2022  
 Copyright © 2022, American Chemical Society

**PERMISSION/LICENSE IS GRANTED FOR YOUR ORDER AT NO CHARGE**

This type of permission/license, instead of the standard Terms and Conditions, is sent to you because no fee is being charged for your order. Please note the following:

- Permission is granted for your request in both print and electronic formats, and translations.
- If figures and/or tables were requested, they may be adapted or used in part.
- Please print this page for your records and send a copy of it to your publisher/graduate school.
- Appropriate credit for the requested material should be given as follows: "Reprinted (adapted) with permission from (COMPLETE REFERENCE CITATION). Copyright (YEAR) American Chemical Society." Insert appropriate information in place of the capitalized words.
- One-time permission is granted only for the use specified in your RightsLink request. No additional uses are granted (such as derivative works or other editions). For any uses, please submit a new request.

If credit is given to another source for the material you requested from RightsLink, permission must be obtained from that source.

[BACK](#) [CLOSE WINDOW](#)

## Probe 28 ref. 152

**CCC | RightsLink®**

Home Help Email Support Yalin Qi

**Long-Term Dynamic Imaging of Cellular Processes Using an AIE Lipid Order Probe in the Dual-Color Mode**

Author: Yue Zheng, Yiwen Ding, Xiaokun Zheng, et al  
 Publication: Analytical Chemistry  
 Publisher: American Chemical Society  
 Date: Jul 1, 2021  
 Copyright © 2021, American Chemical Society

**PERMISSION/LICENSE IS GRANTED FOR YOUR ORDER AT NO CHARGE**

This type of permission/license, instead of the standard Terms and Conditions, is sent to you because no fee is being charged for your order. Please note the following:

- Permission is granted for your request in both print and electronic formats, and translations.
- If figures and/or tables were requested, they may be adapted or used in part.
- Please print this page for your records and send a copy of it to your publisher/graduate school.
- Appropriate credit for the requested material should be given as follows: "Reprinted (adapted) with permission from (COMPLETE REFERENCE CITATION). Copyright (YEAR) American Chemical Society." Insert appropriate information in place of the capitalized words.
- One-time permission is granted only for the use specified in your RightsLink request. No additional uses are granted (such as derivative works or other editions). For any uses, please submit a new request.

If credit is given to another source for the material you requested from RightsLink, permission must be obtained from that source.

[BACK](#) [CLOSE WINDOW](#)

## Probes 29-32 ref. 155

Thank you for your order.

This Agreement between Yalin Qi ("you") and Elsevier ("Elsevier") consists of your license details and the terms and conditions provided by Elsevier and Copyright Clearance Center.

Your confirmation email will contain your order number for future reference.

License Number: 5346180079448 [Printable Details](#)

License date: Jul 11, 2022

| Licensed Content                                                                                                                                                                                                                                                                                                                                                                                                                                                                                                                                                                                                     | Order Details                                                                                                                                                                                                                                                                                                                                                          |
|----------------------------------------------------------------------------------------------------------------------------------------------------------------------------------------------------------------------------------------------------------------------------------------------------------------------------------------------------------------------------------------------------------------------------------------------------------------------------------------------------------------------------------------------------------------------------------------------------------------------|------------------------------------------------------------------------------------------------------------------------------------------------------------------------------------------------------------------------------------------------------------------------------------------------------------------------------------------------------------------------|
| <b>Licensed Content Publisher</b> : Elsevier<br><b>Licensed Content Publication</b> : Sensors and Actuators B: Chemical<br><b>Licensed Content Title</b> : Dual-responsive fluorescent probe for imaging NAD(P)H and mitochondrial viscosity and its application in cancer cell ferroptosis<br><b>Licensed Content Author</b> : Han Wei, Wang Ya, Guanghua Wu, Xueqin Wang, Shuyi Duan, Jingyan Han, Weiyan Cheng, Cai Lixin, Tian, Xiaojian Zhang<br><b>Licensed Content Date</b> : Jan 1, 2022<br><b>Licensed Content Volume</b> : 359<br><b>Licensed Content Issue</b> : n/a<br><b>Licensed Content Pages</b> : 1 | <b>Type of Use</b> : reuse in a journal/magazine<br><b>Requestor type</b> : non-commercial company (non-profit)<br><b>Portion</b> : figures/tables/illustrations<br><b>Number of figures/tables/illustrations</b> : 1<br><b>Format</b> : both print and electronic<br><b>Are you the author of this Elsevier article?</b> : No<br><b>Will you be translating?</b> : No |
| About Your Work                                                                                                                                                                                                                                                                                                                                                                                                                                                                                                                                                                                                      | Additional Data                                                                                                                                                                                                                                                                                                                                                        |
| <b>Title of new article</b> : Recent advances in small-molecule fluorescent probes for studying ferroptosis<br><b>Lead author</b> : Yalin Qi<br><b>Title of targeted journal</b> : Chemical Society Reviews<br><b>Publisher</b> : Royal Society of Chemistry<br><b>Expected publication date</b> : Sep 2022                                                                                                                                                                                                                                                                                                          | <b>Order reference number</b> : 133<br><b>Portions</b> : Fig. 22 (A) The structures of probes 29-32, and the represented responsive mechanism for NAD (P) H and viscosity, respectively. (B) Monitoring of viscosity and NAD (P) H change in HT-1080 cells under ferroptosis induced by erastin and RSL3, respectively.                                                |
| Requestor Location                                                                                                                                                                                                                                                                                                                                                                                                                                                                                                                                                                                                   | Tax Details                                                                                                                                                                                                                                                                                                                                                            |
| <b>Requestor Location</b> : Yalin Qi<br>Nanjing University<br>Nanjing, Jiangsu Province<br>China<br>Actm:                                                                                                                                                                                                                                                                                                                                                                                                                                                                                                            | <b>Publisher Tax ID</b> : GB-494627212                                                                                                                                                                                                                                                                                                                                 |
| <b>\$ Price</b> :<br><b>Total</b> : 0.00 USD                                                                                                                                                                                                                                                                                                                                                                                                                                                                                                                                                                         | <b>Total</b> : 0.00 USD                                                                                                                                                                                                                                                                                                                                                |

[CLOSE WINDOW](#) [ORDER MORE](#)

## Probe 33 ref. 156

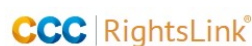

### Multifunctional Fluorescent Probe for Simultaneously Detecting Microviscosity, Micropolarity, and Carboxylesterases and Its Application in Bioimaging

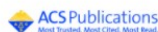

**Author**: Ya-Lin Qi, Hai-Rong Wang, Li-Li Chen, et al  
**Publication**: Analytical Chemistry  
**Publisher**: American Chemical Society  
**Date**: Mar 1, 2022

Copyright © 2022, American Chemical Society

#### PERMISSION/LICENSE IS GRANTED FOR YOUR ORDER AT NO CHARGE

This type of permission/license, instead of the standard Terms and Conditions, is sent to you because no fee is being charged for your order. Please note the following:

- Permission is granted for your request in both print and electronic formats, and translations.
- If figures and/or tables were requested, they may be adapted or used in part.
- Please print this page for your records and send a copy of it to your publisher/graduate school.
- Appropriate credit for the requested material should be given as follows: "Reprinted (adapted) with permission from (COMPLETE REFERENCE CITATION). Copyright (YEAR) American Chemical Society." Insert appropriate information in place of the capitalized words.
- One-time permission is granted only for the use specified in your RightsLink request. No additional uses are granted (such as derivative works or other editions). For any uses, please submit a new request.

If credit is given to another source for the material you requested from RightsLink, permission must be obtained from that source.

[BACK](#)

[CLOSE WINDOW](#)

## Probe 35 ref. 158

| 1. Angewandte Chemie                                                                                                                 |                                                                                                                             | 0.00 USD                                                      |                                                                                                                             |
|--------------------------------------------------------------------------------------------------------------------------------------|-----------------------------------------------------------------------------------------------------------------------------|---------------------------------------------------------------|-----------------------------------------------------------------------------------------------------------------------------|
| Article: A Polarity-Sensitive Ratiometric Fluorescence Probe for Monitoring Changes in Lipid Droplets and Nucleus during Ferroptosis |                                                                                                                             | Publisher Terms and Conditions                                |                                                                                                                             |
| ISSN                                                                                                                                 | 1433-7851                                                                                                                   | Publisher                                                     | WILEY - VCH VERLAG GMBH & CO. KGAA                                                                                          |
| Type of Use                                                                                                                          | Republish in a journal/magazine                                                                                             | Portion                                                       | Image/photo/illustration                                                                                                    |
| <a href="#">Hide Details</a>                                                                                                         |                                                                                                                             |                                                               |                                                                                                                             |
| <b>LICENSED CONTENT</b>                                                                                                              |                                                                                                                             |                                                               |                                                                                                                             |
| Publication Title                                                                                                                    | Angewandte Chemie                                                                                                           | Rightsholder                                                  | John Wiley & Sons - Books                                                                                                   |
| Article Title                                                                                                                        | A Polarity-Sensitive Ratiometric Fluorescence Probe for Monitoring Changes in Lipid Droplets and Nucleus during Ferroptosis | Publication Type                                              | Journal                                                                                                                     |
| Author/Editor                                                                                                                        | Gesellschaft Deutscher Chemiker                                                                                             | Start Page                                                    | 15095                                                                                                                       |
| Date                                                                                                                                 | 01/01/1962                                                                                                                  | End Page                                                      | 15100                                                                                                                       |
| Language                                                                                                                             | English                                                                                                                     | Issue                                                         | 27                                                                                                                          |
| Country                                                                                                                              | Germany                                                                                                                     | Volume                                                        | 60                                                                                                                          |
| <b>REQUEST DETAILS</b>                                                                                                               |                                                                                                                             |                                                               |                                                                                                                             |
| Portion Type                                                                                                                         | Image/photo/illustration                                                                                                    | Distribution                                                  | Worldwide                                                                                                                   |
| Number of Images / photos / Illustrations                                                                                            | 1                                                                                                                           | Translation                                                   | Original language of publication                                                                                            |
| Format (select all that apply)                                                                                                       | Electronic                                                                                                                  | Copies for the disabled?                                      | Yes                                                                                                                         |
| Who will republish the content?                                                                                                      | Publisher, not-for-profit                                                                                                   | Minor editing privileges?                                     | No                                                                                                                          |
| Duration of Use                                                                                                                      | Life of current and all future editions                                                                                     | Incidental promotional use?                                   | No                                                                                                                          |
| Lifetime Unit Quantity                                                                                                               | Up to 999                                                                                                                   | Currency                                                      | USD                                                                                                                         |
| Rights Requested                                                                                                                     | Main product                                                                                                                |                                                               |                                                                                                                             |
| <b>NEW WORK DETAILS</b>                                                                                                              |                                                                                                                             |                                                               |                                                                                                                             |
| Title                                                                                                                                | Recent advances in small molecule fluorescent probes for studying ferroptosis                                               | Publisher Imprint                                             | N/A                                                                                                                         |
| Author                                                                                                                               | Ya-Lin Qi                                                                                                                   | Expected publication date                                     | 2022-05-31                                                                                                                  |
| Publication                                                                                                                          | Chemical society review                                                                                                     | Expected size (number of pages)                               | 52                                                                                                                          |
| Publisher                                                                                                                            | Royal Society of Chemistry                                                                                                  | Standard Identifier                                           | N/A                                                                                                                         |
| <b>ADDITIONAL DETAILS</b>                                                                                                            |                                                                                                                             |                                                               |                                                                                                                             |
| Order reference number                                                                                                               | N/A                                                                                                                         | The requesting person / organization to appear on the license | Ya-Lin Qi                                                                                                                   |
| <b>REUSE CONTENT DETAILS</b>                                                                                                         |                                                                                                                             |                                                               |                                                                                                                             |
| Title, description or numeric reference of the portion(s)                                                                            | Figure 21                                                                                                                   | Title of the article/chapter the portion is from              | A Polarity-Sensitive Ratiometric Fluorescence Probe for Monitoring Changes in Lipid Droplets and Nucleus during Ferroptosis |
| Editor of portion(s)                                                                                                                 | Wang, Kang-Nan; Liu, Liu-Yi; Mao, Duo; Xu, Shidang; Tan, Cai-Ping; Cao, Qian; Mao, Zong-Wan; Liu, Bin                       | Author of portion(s)                                          | Wang, Kang-Nan; Liu, Liu-Yi; Mao, Duo; Xu, Shidang; Tan, Cai-Ping; Cao, Qian; Mao, Zong-Wan; Liu, Bin                       |
| Volume of serial or monograph                                                                                                        | 60                                                                                                                          | Issue, if republishing an article from a serial               | 27                                                                                                                          |
| Page or page range of portion                                                                                                        | 15095-15100                                                                                                                 | Publication date of portion                                   | 2021-06-25                                                                                                                  |

## Probe 36 ref. 163

CCC | RightsLink®

Home ? Email Support Yalin Qi

### Reaction-Based Color-Convertible Fluorescent Probe for Ferroptosis Identification

Author: Leilei Shi, Qinghua Guan, Xihui Gao, et al

Publication: Analytical Chemistry

Publisher: American Chemical Society

Date: Aug 1, 2018

Copyright © 2018, American Chemical Society

#### PERMISSION/LICENSE IS GRANTED FOR YOUR ORDER AT NO CHARGE

This type of permission/license, instead of the standard Terms and Conditions, is sent to you because no fee is being charged for your order. Please note the following:

- Permission is granted for your request in both print and electronic formats, and translations.
- If figures and/or tables were requested, they may be adapted or used in part.
- Please print this page for your records and send a copy of it to your publisher/graduate school.
- Appropriate credit for the requested material should be given as follows: "Reprinted (adapted) with permission from (COMPLETE REFERENCE CITATION). Copyright (YEAR) American Chemical Society." Insert appropriate information in place of the capitalized words.
- One-time permission is granted only for the use specified in your RightsLink request. No additional uses are granted (such as derivative works or other editions). For any uses, please submit a new request.

If credit is given to another source for the material you requested from RightsLink, permission must be obtained from that source.

BACK

CLOSE WINDOW

## Probes 37-40 ref. 165



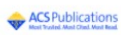

### Molecular Imaging of Labile Heme in Living Cells Using a Small Molecule Fluorescent Probe

Author: Kanta Kawai, Tasuku Hirayama, Haruka Imai, et al

Publication: Journal of the American Chemical Society

Publisher: American Chemical Society

Date: Mar 1, 2022

Copyright © 2022, American Chemical Society

#### PERMISSION/LICENSE IS GRANTED FOR YOUR ORDER AT NO CHARGE

This type of permission/license, instead of the standard Terms and Conditions, is sent to you because no fee is being charged for your order. Please note the following:

- Permission is granted for your request in both print and electronic formats, and translations.
  - If figures and/or tables were requested, they may be adapted or used in part.
  - Please print this page for your records and send a copy of it to your publisher/graduate school.
  - Appropriate credit for the requested material should be given as follows: "Reprinted (adapted) with permission from (COMPLETE REFERENCE CITATION). Copyright (YEAR) American Chemical Society." Insert appropriate information in place of the capitalized words.
  - One-time permission is granted only for the use specified in your RightsLink request. No additional uses are granted (such as derivative works or other editions). For any uses, please submit a new request.
- If credit is given to another source for the material you requested from RightsLink, permission must be obtained from that source.

[BACK](#)

[CLOSE WINDOW](#)
